# Supplementary material for: The Association Between Sleep and Metabolic Syndrome: A Systematic Review and Meta-Analysis
Source: PubMed Central journal article supplement (PMC8640251; doi:10.3389/fendo.2021.773646), 2021-11-19

Supplementary materials: Table 1s: search strategy

PubMed

- #1 Sleep [Mesh]
- #2 Sleep disorders [Mesh]
- #3 sleep\*[Title/Abstract]
- #4 insomnia\*[Title/Abstract]
- #5 wakeful\*[Title/Abstract]
- #6 dyssomn\*[Title/Abstract]
- #7 "Sleep Initiation and Maintenance Disorders" [Mesh]
- #8 "disorders of excessive somnolence"[Mesh]
- #9 hypersomnia[Title/Abstract]
- #10 parasomnia[Title/Abstract]
- #11 circadian\*[Title/Abstract]
- #12 "rest activity" [Title/Abstract]
- #13 somnolence[Title/Abstract]
- #14 sundowning[Title/Abstract]
- #15 "Chronobiology Disorders"[Mesh]
- #16 "Circadian Rhythm"[Mesh]
- #17 vigilance[Title/Abstract]
- #18 alertness[Title/Abstract]
- #19 drowsiness[Title/Abstract]
- #20 hypersomnolence\*[Title/Abstract]
- #21 eveningness[Title/Abstract]
- #22 morningness[Title/Abstract]
- #23 arousal[Title/Abstract]
- #24 "Psychomotor Performance"[Mesh]
- #25 fatigue[Title/Abstract]
- #26 "neurocognitive performance"[Title/Abstract]
- #27 "concentration difficulties"[Title/Abstract]
- #28 OR/ #1-#27
- #29 Metabolic syndrome[MeSH]
- #30 Metabolic syndrome[Title/Abstract]
- #31 syndrome x[Title/Abstract]
- #32 metS[Title/Abstract]
- #33 insulin resistance syndrome[Title/Abstract]
- #34 "Metabolic X Syndrome"[Title/Abstract]
- #35 "Metabolic Cardiovascular Syndrome"[Title/Abstract]
- #36 cardio-metabolic syndrome[Title/Abstract]
- #37 OR/ #29-#36
- #38 #28 AND #37

Table 2s. Newcastle-Ottawa Quality Assessment Scale of the cohort studies.

| Study (First author/year) | Selection                                |                                     |                           |                                                                          | Comparability | Outcome               |                                                 |                                  | Total scores |
|---------------------------|------------------------------------------|-------------------------------------|---------------------------|--------------------------------------------------------------------------|---------------|-----------------------|-------------------------------------------------|----------------------------------|--------------|
|                           | Representativeness of the exposed cohort | Selection of the non-exposed cohort | Ascertainment of exposure | Demonstration that outcome of interest was not present at start of study |               | Assessment of outcome | Was follow-up long enough for outcomes to occur | Adequacy of follow up of cohorts |              |
| Arora,2011                | ★                                        | ★                                   | ★                         | ★                                                                        | ★★            | ★                     | ★                                               | ★                                | 9            |
| Chang,2015                | ★                                        | ★                                   | ★                         | ★                                                                        | ★★            | ★                     | ★                                               | ★                                | 9            |
| Chaput,2013               | ★                                        | ★                                   | ★                         | ★                                                                        | ★★            | ★                     | ★                                               | ★                                | 9            |
| Deng,2017                 | ★                                        | ★                                   | ★                         | ★                                                                        | ★★            | ★                     | ★                                               | ★                                | 9            |
| Itani,2017                | ★                                        | ★                                   | ★                         | ★                                                                        | ★★            | ★                     | ★                                               | ★                                | 9            |
| Kim,2015                  | ★                                        | ★                                   | ★                         | ★                                                                        | ★★            | ★                     | ★                                               | ★                                | 9            |
| Li,2015                   | ★                                        | ★                                   | ★                         | ★                                                                        | ★★            | ★                     | ★                                               | ★                                | 9            |
| Song,2016                 | ★                                        | ★                                   | ★                         | ★                                                                        | ★★            | ★                     | ★                                               | ★                                | 9            |
| Titova,2018               | ★                                        | ★                                   | ★                         | ★                                                                        | ★★            | ★                     | ★                                               | ★                                | 9            |
| Yang,2016                 | ★                                        | ★                                   | ★                         | ★                                                                        | ★★            | ★                     | ★                                               | ★                                | 9            |
| Ye,2020                   | ★                                        | ★                                   | ★                         | ★                                                                        | ★★            | ★                     | ★                                               | ★                                | 9            |
| choi,2011                 | ★                                        | ★                                   | ★                         | ★                                                                        | ★★            | ★                     | ★                                               | ★                                | 9            |

Fig. 1s. Meta-analysis of the association between sleep duration (6-7 hours) and risk of metabolic syndrome.

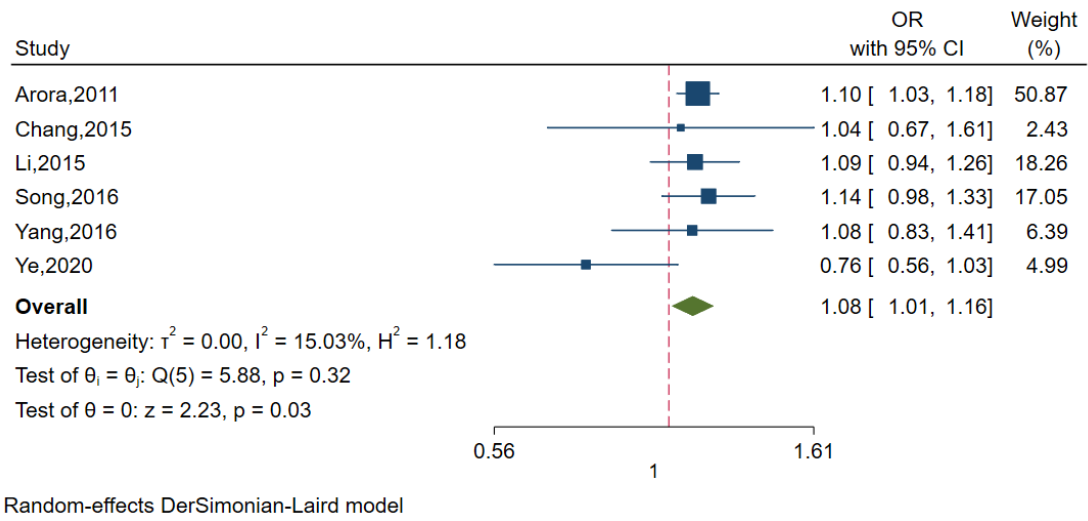

Fig. 2s. Meta-analysis of the association between sleep duration (8-9 hours) and risk of metabolic syndrome.

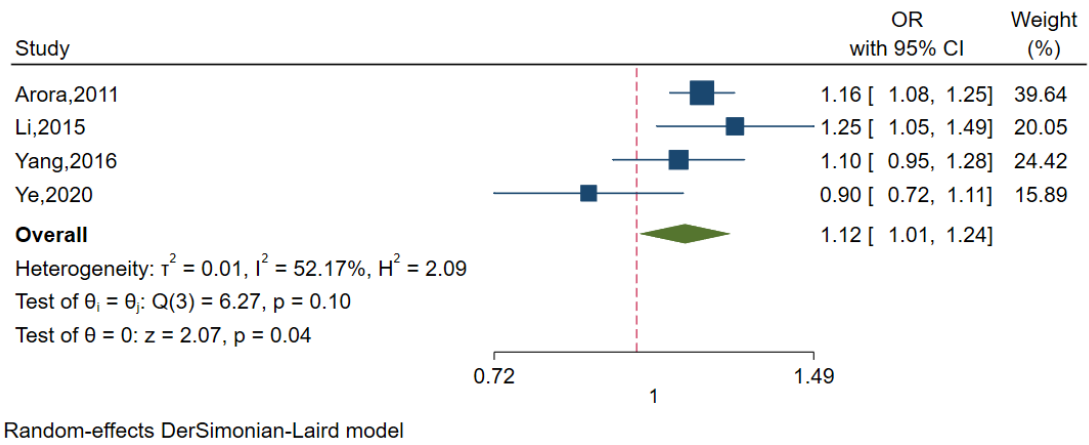

Fig. 3s. Meta-analysis of the association between sleep duration (>9 hours) and risk of metabolic syndrome.

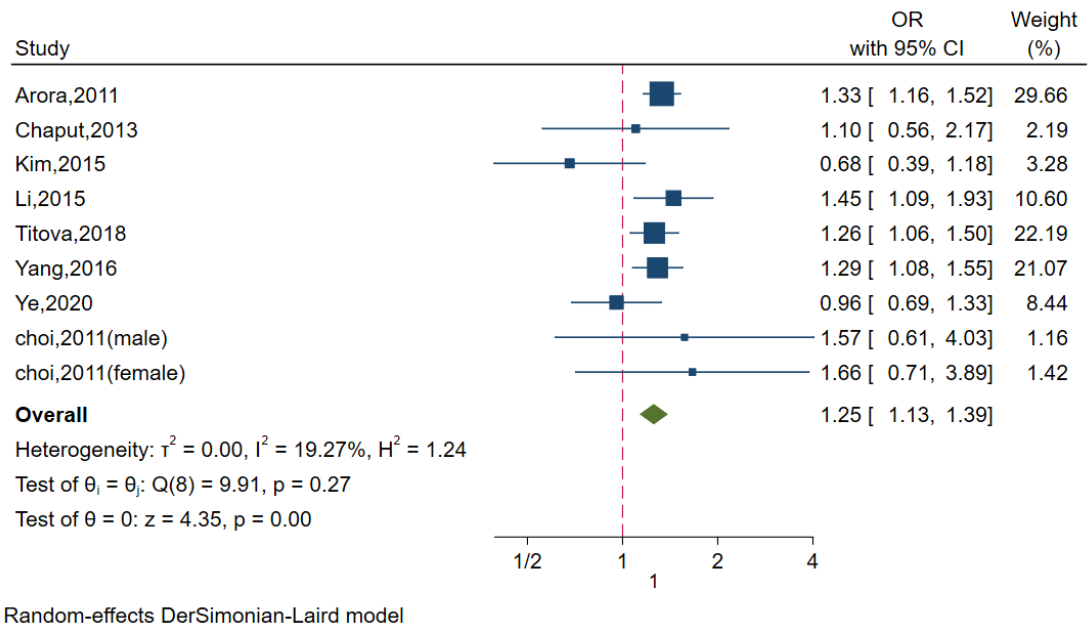

Fig. 4s. Funnel plot

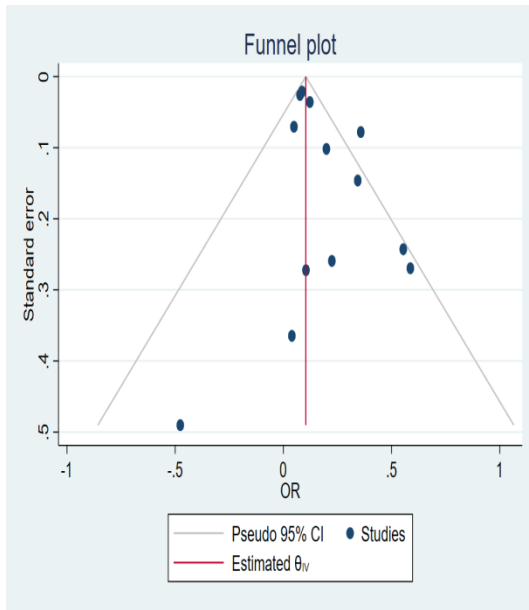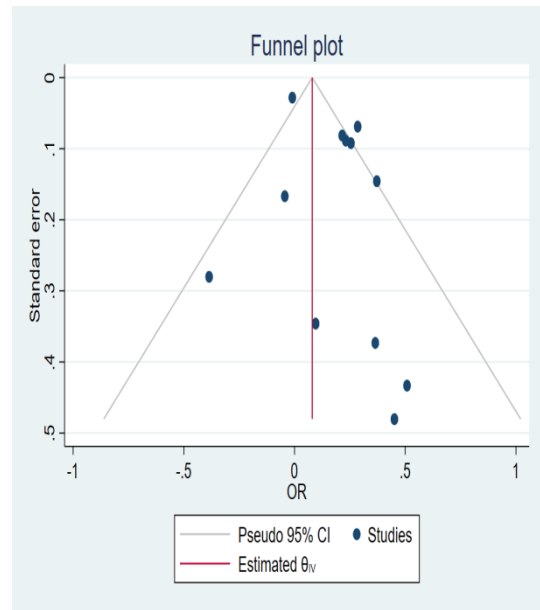

Supplement: DataSheet_1.pdf [file DataSheet_1.pdf]
